# Supplementary material for: DNA-templated silver nanoclusters as label-free fluorescent probes for detection of bleomycin
Source: Royal Society of Chemistry journal article supplement (doi:10.1039/c3ay41219a), 2013-01-01
Supplement: c3ay41219a.pdf [file c3ay41219a.pdf]

## SUPPORTING INFORMATION

*For*

### DNA-templated silver nanoclusters as label-free fluorescent probes for detection of bleomycin

Yong Chang,<sup>a</sup> Pu Zhang,<sup>a</sup> Yan Yu,<sup>b</sup> Yu Qing Du,<sup>b</sup> Wei Wang,<sup>b</sup> Cheng Zhi Huang\*<sup>a,b</sup>

<sup>a</sup> Education Ministry Key Laboratory on Luminescence and Real-Time Analysis, School of Chemistry and Chemical Engineering

<sup>b</sup> College of Pharmaceutical Sciences, Southwest University, Southwest University, Chongqing 400715, China.

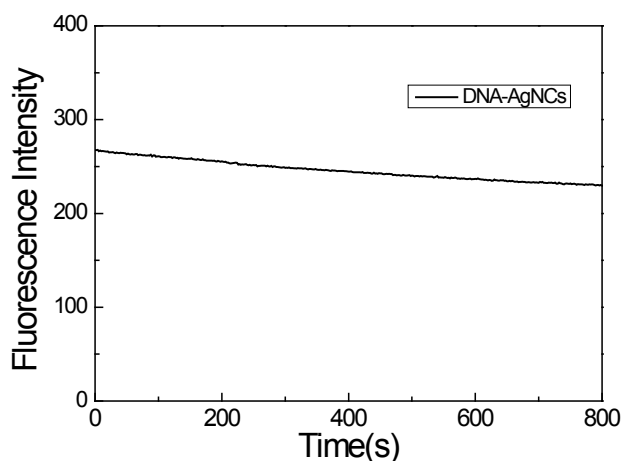

**Fig. S1** Kinetic study of the fluorescence change of DNA-AgNCs in 15 min. The fluorescence was monitored at 640 nm under excited at 580 nm.

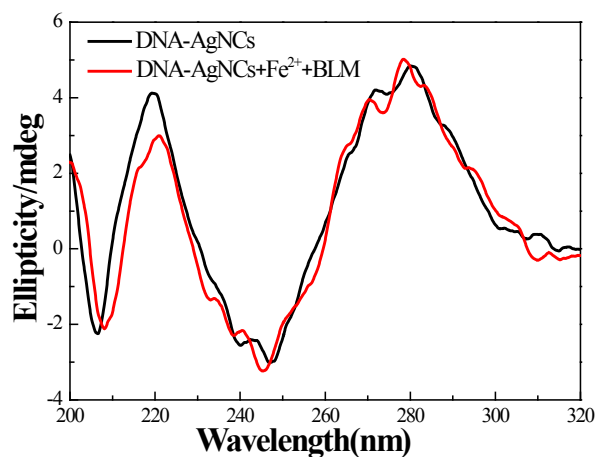

**Fig. S2** Circular dichroism spectra of DNA-AgNCs before and after the reaction. Concentrations: DNA-AgNCs, 2  $\mu$ M; Fe<sup>2+</sup>, 3  $\mu$ M; BLM,

3  $\mu\text{M}$ ; pH 7.4.

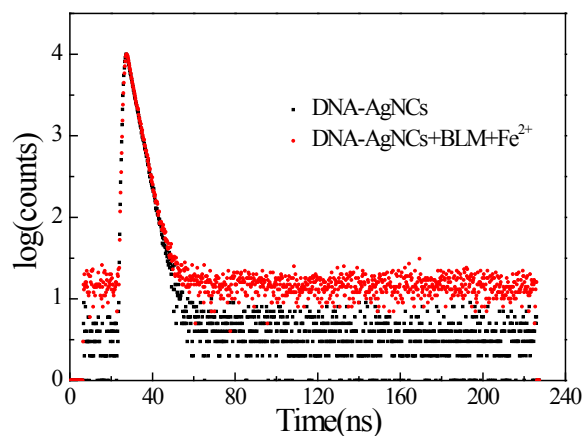

**Fig. S3** The fluorescence decay curves of DNA-AgNCs before (black) and after (red) the reaction of the complex of BLM and Fe<sup>2+</sup>. Concentrations: DNA-AgNCs, 2  $\mu\text{M}$ ; Fe<sup>2+</sup>, 3  $\mu\text{M}$ ; BLM, 3  $\mu\text{M}$ ; pH 7.4.

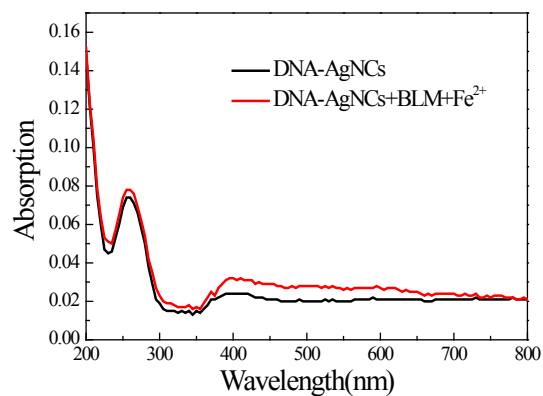

**Fig. S4** UV-Vis absorption spectra of DNA-AgNCs before (black) and after (red) the reaction of the complex of BLM and Fe<sup>2+</sup>. Concentrations: DNA-AgNCs, 300 nM; Fe<sup>2+</sup>, 300 nM; BLM, 300 nM; pH 7.4.

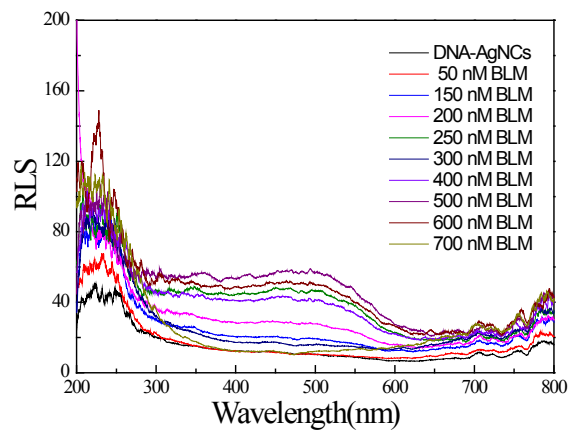

**Fig. S5** The photoemission spectra of DNA-AgNCs-BLM-Fe<sup>2+</sup> system. Concentrations: DNA-AgNCs, 300 nmol/L; pH, 7.4.

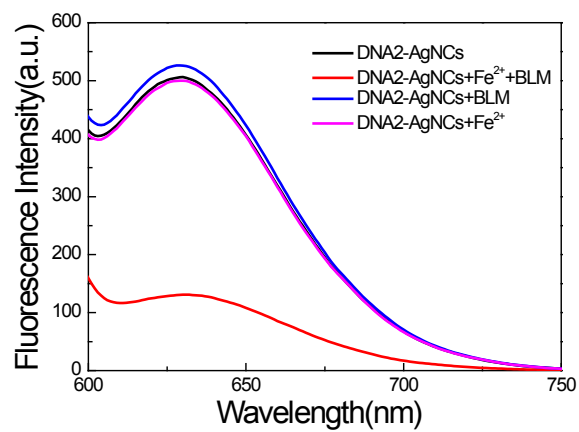

**Fig. S6** The photoluminescence spectra of DNA2-AgNCs-BLM-Fe<sup>2+</sup> system. Concentrations: DNA2-AgNCs, 300 nmol/L, BLM, 500 nmol/L, Fe<sup>2+</sup>, 500 nmol/L; pH, 7.4
